# Supplementary material for: Whole Genome Resequencing of Arkansas Progressor and Regressor Line Chickens to Identify SNPs Associated with Tumor Regression
Source: Genes (Basel). 2018 Oct 19;9(10):512. doi: 10.3390/genes9100512 (PMC6210987; doi:10.3390/genes9100512)
Supplement: Supplementary file 1 [file genes-09-00512-s001.xls]

## Sheet: Sheet0
Diseases or Functions Annotation	p-Value	Molecules	# Molecules
quantity of folic acid	0.0188	SLC46A1	1
immobility behavior	0.00421	DISC1	1
adaptive behavior	0.00211	DISC1	1
unresectable desmoid tumor	0.0454	IFNAR2	1
tumorigenesis of melanoma cell lines	0.0373	BMX	1
stage 2b melanoma	0.00421	IFNAR2	1
stage 2 desmoid tumor	0.0454	IFNAR2	1
resected desmoid tumor	0.0454	IFNAR2	1
recurrent melanoma	0.0126	IFNAR2	1
melanoma with microscopic nodal involvement	0.00421	IFNAR2	1
completely resected melanoma	0.00421	IFNAR2	1
AIDS related Kaposi sarcoma	0.0434	IFNAR2	1
advanced desmoid tumor	0.0454	IFNAR2	1
unresectable giant cell tumor of bone	0.00631	IFNAR2	1
metastatic giant cell tumor of bone	0.00631	IFNAR2	1
localized giant cell tumor of bone	0.00421	IFNAR2	1
progressive carcinoid tumor	0.0126	IFNAR2	1
Ph positive chronic myeloid leukemia in chronic phase	0.0373	IFNAR2	1
hairy-cell leukemia	0.0454	IFNAR2	1
aggressive follicular B-cell lymphoma	0.00631	IFNAR2	1
melanoma with gross nodal involvement	0.00421	IFNAR2	1
androgen-independent prostate tumor	0.0147	BMX	1
uptake of D-fructose	0.00631	SLC2A5	1
transport of DL-fructose	0.00421	SLC2A5	1
transport of D-fructose	0.00841	SLC2A5	1
absorption of D-hexose	0.00841	SLC2A5	1
Behcet's disease	0.0167	IFNAR2	1
retinal vasculitis	0.00421	IFNAR2	1
differentiation of endothelial cell lines	0.0105	BMX	1
angiogenesis of skin	0.0291	BMX	1
mitotic index of pre-B lymphocytes	0.00421	PTPN2	1
cytokinesis of kidney cell lines	0.00631	PTPN2	1
apoptosis of erythroblasts	0.0332	SLC46A1	1
morphogenesis of dendrites	0.00421	RAB17	1
extension of neurites	0.00226	BMX,DISC1,FEZ1	3
multinucleation of kidney cell lines	0.00631	PTPN2	1
morphology of dendrites	0.00306	DISC1,FEZ1	2
response of fibroblast cell lines	0.0312	IFNAR2	1
formation of aggresome	0.025	DISC1	1
fasciculation of motor axons	0.00211	FEZ1	1
differentiation of prostate cancer cell lines	0.025	BMX	1
development of hippocampal neurons	0.0291	RAB17	1
lymphopoiesis of B lymphocytes	0.0291	PTPN2	1
differentiation of reticulocytes	0.00421	SLC46A1	1
differentiation of erythroblasts	0.0474	SLC46A1	1
endocytosis by fibroblast cell lines	0.00841	BMX	1
assembly of stress granule	0.0105	DISC1	1
release of reticulocytes	0.00421	SLC46A1	1
positioning of neurons	0.0353	DISC1	1
migration of CA1 neuron	0.00211	DISC1	1
radiosensitivity of vascular endothelial cells	0.00211	BMX	1
mass of epididymal fat	0.025	SLC2A5	1
hypertrophic scarring	0.00631	IFNAR2	1
harlequin ichthyosis	0.00211	ABCA12	1
condylomata acuminata	0.0393	IFNAR2	1
chronic inflammation of skin	0.00421	BMX	1
disaccharide intolerance, type I	0.00211	SI	1
chronic hepatitis C	0.00423	IFNAR2,SI	2
chronic non-A, non-B hepatitis	0.00631	IFNAR2	1
conversion of DNA	0.00631	DHX36	1
development of cerebral cortex	0.0175	DISC1,RAB17	2
non-insulin-dependent diabetes mellitus	0.0354	SCNN1D,SI,THADA	3
central hypothyroidism and testicular enlargement	0.00211	IGSF1	1
binding of Sis-inducible element	0.0393	BMX	1
binding of MYC-MAX binding site	0.00421	MGA	1
re-epithelialization of wound	0.025	BMX	1
pancytopenia	0.00631	SLC46A1	1
quantity of granulocyte-macrophage progenitor cells	0.0105	PTPN2	1
quantity of colony forming multilineage cells	0.0312	PTPN2	1
accumulation of erythroblasts	0.00421	SLC46A1	1
hereditary folate malabsorption	0.00211	SLC46A1	1
Oguchi disease	0.00421	SAG	1
Hereditary Eye Disease	0.032	RPGR,SAG	2
X-linked retinitis pigmentosa	0.00421	RPGR	1
X-linked atrophic macular degeneration	0.00211	RPGR	1
replication of virus chimera	0.0126	IFNAR2	1
infection by Hepatitis C virus	0.0373	IFNAR2	1
binding of HIV-1	0.0454	TARBP1	1
posterior uveitis	0.00631	IFNAR2	1
panuveitis	0.00631	IFNAR2	1
secretion of glucosylceramide	0.00421	ABCA12	1
impaired glucose tolerance	0.0413	SI	1
microalbuminuria	0.0474	SCNN1D	1
transport of H+	0.0126	SLC46A1	1
exchange of nucleotide	0.0454	RPGR	1
Schizophrenia	0.043	DISC1,FEZ1,PIK3C2G,TARBP1	4
stress response of mice	0.0167	DISC1	1
hydrolysis of protein fragment	0.00841	PTPN2	1
quantity of photoreceptors	0.0393	RPGR	1
